# Supplementary material for: Functional Connectivity Basis and Underlying Cognitive Mechanisms for Gender Differences in Guilt Aversion
Source: eNeuro. 2021 Dec 15;8(6):ENEURO.0226-21.2021. doi: 10.1523/ENEURO.0226-21.2021 (PMC8675089; doi:10.1523/ENEURO.0226-21.2021)
Supplement: Extended Data Figure 5-1 — Differences of activities related to inequity between men and women. Download Figure 5-1, DOCX file. [file enu-eN-NWR-0226-21-s11.docx]

**Extended Data Figure 5-1. Differences of activities related to inequity between men and women.**

| Brain area | MNI coordinates | | | Voxel size (k) | *t* value |
| --- | --- | --- | --- | --- | --- |
| *x* | *y* | *z* |
| R. Ventral Striatum | 6 | 22 | 6 | 670 | 4.54 |
| R. VLPFC | 38 | 44 | -8 | 146 | 4.30 |
| R. Inferior Temporal Cortex | 50 | -62 | -14 | 38 | 4.10 |
| R Occipital Cortex | 28 | -84 | -20 | 48 | 4.02 |

Notes: MNI coordinates (*x, y*, *z*) indicate the location of the peak correlation. Voxel sizes show the number of supra-threshold voxels, and *t* values correspond with the peak activation voxels. For the whole brain analysis, the threshold was set at *P* < 0.001 uncorrected; activity in the right striatum was maintained after small volume FWE corrections at *P* < 0.05. R: right.
